# Supplementary figures and images for: Iron(iii) activation hits a [4 + 4] macrocycle
Source: Royal Society of Chemistry journal article supplement (doi:10.1039/b416250a), 2005-01-01

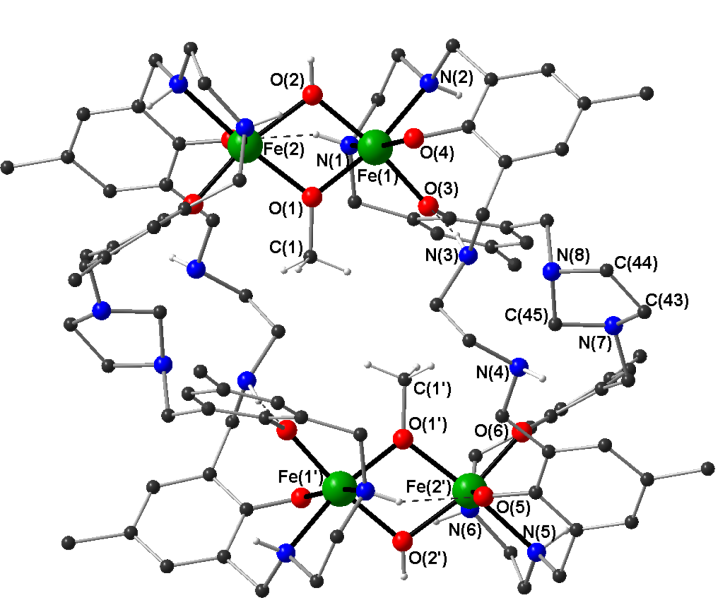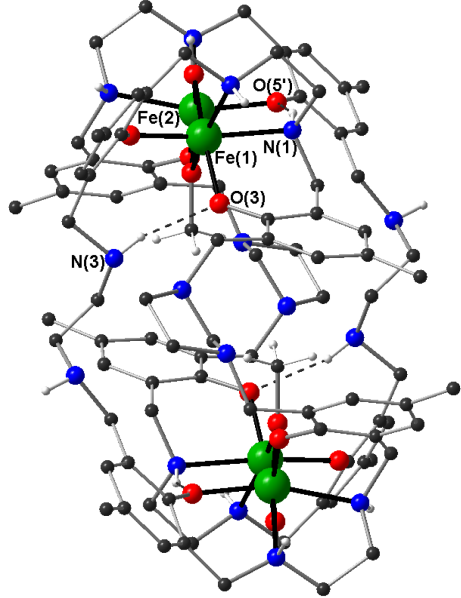

Supplement: b416250a.pdf [file b416250a.pdf]
